# Supplementary material for: A genome-wide miRNA screen revealed miR-603 as a MGMT-regulating miRNA in glioblastomas
Source: PubMed Central journal article supplement (PMC4147303; doi:10.18632/oncotarget.1974), 2014-05-14
Supplement: oncotarget-05-4026-s001.pdf [file oncotarget-05-4026-s001.pdf]

# A genome-wide miRNA screen revealed miR-603 as a MGMT-regulating miRNA in glioblastomas

## Supplementary Material

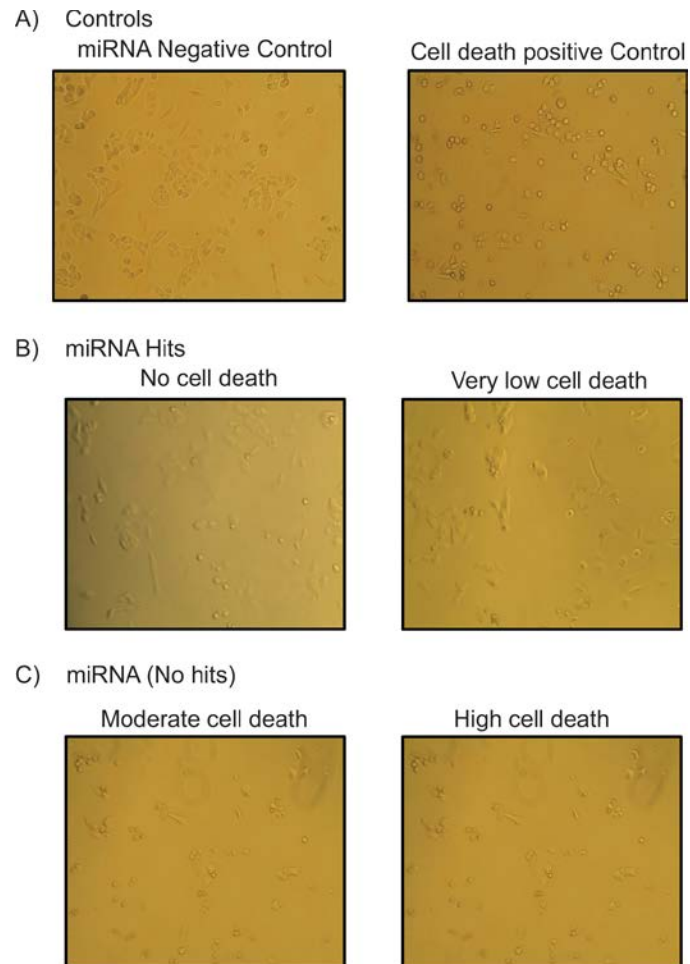

**Supplementary Figure 1:** Representative images depicting miRNA toxicity from the screen. Toxicity was scored by visual inspection, Qiagen cell death siRNA was used as a positive control for comparison on each 96 well plate.

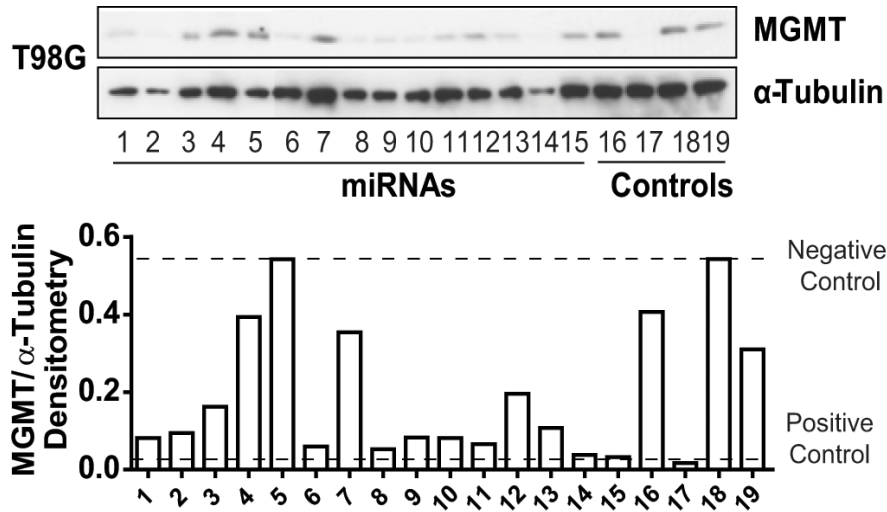

|                  |                  |                   |                    |
|------------------|------------------|-------------------|--------------------|
| 1 hsa-miR-616-5p | 6 hsa-miR-767-3p | 11 hsa-miR-181d   | 16 miR-Control     |
| 2 hsa-miR-603    | 7 hsa-let7i-3p   | 12 hsa-let7a2-3p  | 17 MGMT siRNA      |
| 3 hsa-let7f2-3p  | 8 hsa-miR-20a-3p | 13 hsa-miR-30d    | 18 Non-Transfected |
| 4 hsa-miR-497-3p | 9 hsa-miR-612    | 14 hsa-miR-589-3p | 19 Mock            |
| 5 hsa-miR-155-5p | 10 hsa-miR-181b  | 15 hsa-miR-429    |                    |

**Supplementary Figure 2:** 15 candidate miRNAs were transfected into T98G glioblastoma cells. 48 hours after transfection, MGMT silencing was assessed by Western blotting;  $\alpha$ -tubulin was used as a loading control. Quantitative assessments of MGMT expression are shown in the bottom panel.

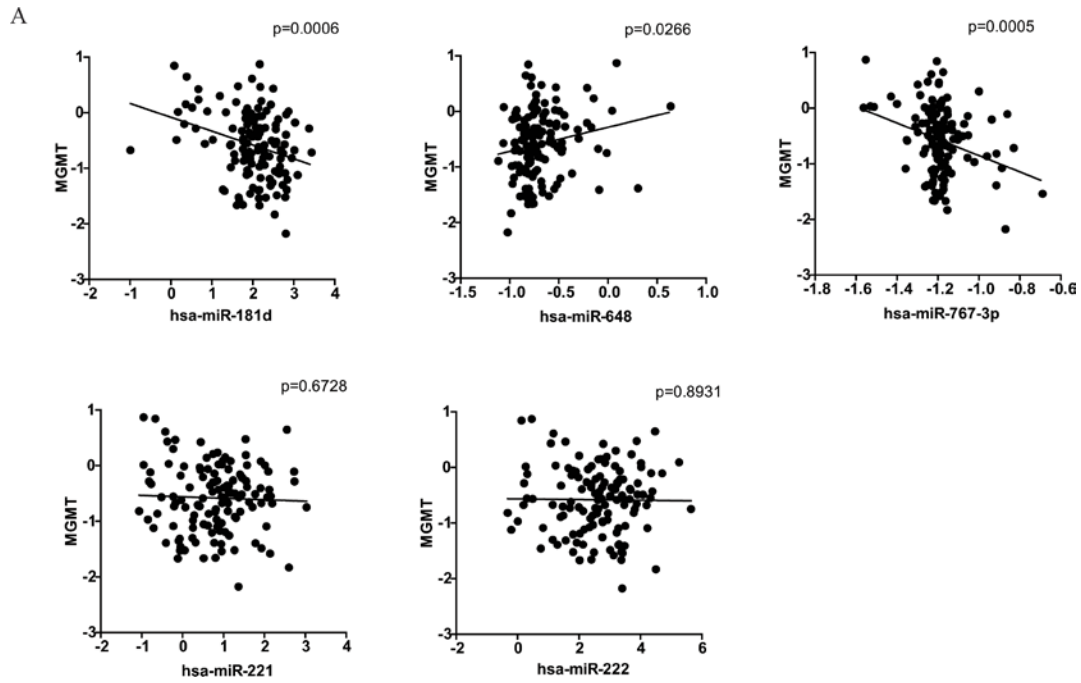

**Supplementary Figure 3:** Scatter plot demonstrating correlation between miRNA expression levels and MGMT expression levels in the TCGA. Glioblastoma specimens with unmethylated MGMT promoters (threshold cutoff <math>< -0.25</math>) were analyzed for correlation between MGMT and miRNA.

**SuppTable-1:**

| <i>miRNAs exhibiting strong MGMT silencing</i> |                 |                |
|------------------------------------------------|-----------------|----------------|
| Number                                         | miRNA name      | % MGMT protein |
| 1                                              | hsa-miR-616-3p  | 36.70          |
| 2                                              | hsa-miR-603     | 40.36          |
| 3                                              | hsa-let-7f-2-3p | 28.30          |
| 4                                              | hsa-miR-497-3p  | 33.52          |
| 5                                              | hsa-miR-155-5p  | 45.67          |
| 6                                              | hsa-miR-767-3p  | 42.25          |
| 7                                              | hsa-let7i-3p    | 30.32          |
| 8                                              | hsa-miR-20a-3p  | 33.25          |
| 9                                              | hsa-miR-612     | 44.82          |
| 10                                             | has-miR-181b    | 35.7           |
| 11                                             | hsa-miR-181d    | 37.21          |
| 12                                             | hsa-let-7a2-3p  | 27.52          |
| 13                                             | hsa-miR-30d     | 36.20          |
| 14                                             | hsa-miR-589-3p  | 28.79          |
| 15                                             | hsa-miR-429     | 46.84          |
| 16                                             | hsa-miR-342-3p  | 48.76          |
| 17                                             | hsa-miR-379     | 49.73          |
| 18                                             | hsa-miR-548a-3p | 36.76          |
| 19                                             | hsa-miR-325     | 24.11          |
| 20                                             | hsa-miR-361-5p  | 34.66          |
| 21                                             | hsa-miR-338-5p  | 49.05          |
| 22                                             | hsa-miR-30e-3p  | 19.79          |
| 23                                             | hsa-miR-17      | 33.77          |
| 24                                             | hsa-miR-191     | 33.47          |
| 25                                             | hsa-miR-561     | 36.36          |
| 26                                             | hsa-miR-371     | 41.14          |
| 27                                             | hsa-miR-324-5p  | 45.46          |
| 28                                             | hsa-miR-651     | 11.39          |

**SuppTable-2:**

| <i>miRNAs exhibiting MGMT silencing</i> |                   |
|-----------------------------------------|-------------------|
| 1                                       | hsa-miR-18a-3p    |
| 2                                       | hsa-miR-17-3p     |
| 3                                       | hsa-miR-593-3p    |
| 4                                       | hsa-miR-125b-2-3p |
| 5                                       | hsa-miR-539       |
| 6                                       | hsa-miR-545-5p    |
| 7                                       | hsa-miR-24-2-3p   |
| 8                                       | hsa-miR-24-1-3p   |
| 9                                       | hsa-miR-2054      |
| 10                                      | hsa-miR-301a      |
| 11                                      | hsa-miR-1975      |
| 12                                      | hsa-miR-335-3p    |
| 13                                      | hsa-miR-27b-3p    |
| 14                                      | hsa-miR-154-3p    |
| 15                                      | hsa-miR-130b      |
| 16                                      | hsa-miR-146a-3p   |
| 17                                      | hsa-miR-181c-3p   |
| 18                                      | hsa-miR-1272      |
| 19                                      | hsa-miR-124-3p    |
| 20                                      | hsa-miR-508-5p    |
| 21                                      | hsa-miR-371-3p    |
| 22                                      | hsa-miR-548       |
| 23                                      | hsa-miR-570       |
| 24                                      | hsa-miR-491-3p    |
| 25                                      | hsa-miR-1238      |
| 26                                      | hsa-miR-578       |
| 27                                      | hsa-miR-1270      |
| 28                                      | hsa-miR-618       |
| 29                                      | hsa-miR-329       |
| 30                                      | hsa-miR-1244      |
| 31                                      | hsa-miR-1255a     |
| 32                                      | hsa-miR-29a-3p    |
| 33                                      | hsa-miR-1206      |
| 34                                      | hsa-miR-1278      |
| 35                                      | hsa-miR-586       |
| 36                                      | hsa-miR-483-3p    |
| 37                                      | hsa-miR-545       |
| 38                                      | hsa-miR-1323      |
| 39                                      | hsa-miR-770-5p    |

|    |                 |
|----|-----------------|
| 40 | hsa-miR-146b-5p |
| 41 | hsa-miR-875-5p  |
| 42 | hsa-miR-10b     |
| 43 | hsa-miR-532-5p  |
| 44 | hsa-miR-377     |
| 45 | hsa-miR-421     |
| 46 | hsa-miR-208b    |
| 47 | hsa-miR-367     |
| 48 | hsa-miR-136     |
| 49 | hsa-miR-1303    |
| 50 | hsa-miR-580     |
| 51 | hsa-miR-9       |
| 52 | hsa-miR-7       |
| 53 | hsa-miR-185     |
| 54 | hsa-miR-449a    |
| 55 | hsa-miR-30b     |
| 56 | hsa-miR-30c     |
| 57 | hsa-miR-153     |
| 58 | hsa-miR-218     |
| 59 | hsa-miR-96      |
| 60 | hsa-miR-181a-3p |
| 61 | hsa-miR-22      |
| 62 | hsa-miR-425     |
| 63 | hsa-miR-369-5p  |
| 64 | hsa-miR-323-5p  |
| 65 | hsa-miR-208a    |
| 66 | hsa-miR-93      |
| 67 | hsa-miR-140-5p  |
| 68 | hsa-miR-199a-5p |
| 69 | hsa-miR-877     |
| 70 | hsa-miR-145     |
| 71 | hsa-miR-33a     |
| 72 | hsa-miR-29b     |
| 73 | hsa-miR-205     |
| 74 | hsa-miR-139-5p  |
| 75 | hsa-miR-378     |
